# Supplementary material for: Changing Trends in the Incidence and Clinical Features of Pneumocystis jirovecii Pneumonia in Non-HIV Patients before and during the COVID-19 Era and Risk Factors for Mortality between 2016 and 2022
Source: MDPI journal article supplement (doi:10.3390/life13061335), 2023-06-07
Supplement: s1 [file s1]

## Supplement Materials.

**Supplementary Table S1. Characteristics of survivors and non-survivors in patients with *P. jirovecii* pneumonia**

| Characteristics                         | Over all<br>(n=112) | Survivor<br>(n =62) | Non-survivor<br>(n =50) | <i>p</i> |
|-----------------------------------------|---------------------|---------------------|-------------------------|----------|
| Comorbidity or underlying disease       |                     |                     |                         |          |
| Cardiovascular disease                  | 14 (12.5)           | 10 (16.1)           | 4 (8.0)                 | 0.196    |
| Cerebrovascular disease                 | 11 (9.8)            | 8 (12.9)            | 3 (6.0)                 | 0.340    |
| Chronic kidney disease                  | 20 (17.9)           | 12 (19.4)           | 8 (16.0)                | 0.645    |
| Chronic lung disease                    | 18 (16.1)           | 7 (11.3)            | 11 (22.0)               | 0.125    |
| Diabetes                                | 37 (33.0)           | 20 (32.3)           | 17 (34.0)               | 0.846    |
| Heart failure                           | 12 (10.7)           | 7 (11.3)            | 5 (10.0)                | 0.826    |
| Hypertension                            | 52 (46.4)           | 30 (48.4)           | 22 (44.0)               | 0.644    |
| Liver disease                           | 17 (15.2)           | 8 (12.9)            | 9 (18.0)                | 0.455    |
| Connective tissue diseases              | 22 (19.6)           | 11 (17.7)           | 11 (22.0)               | 0.573    |
| Solid cancer                            | 43 (38.4)           | 26 (41.9)           | 17 (34.0)               | 0.391    |
| Hematologic malignancy                  | 21 (18.8)           | 13 (21.0)           | 8 (16.0)                | 0.503    |
| Hematopoietic stem cell transplantation | 5 (4.5)             | 2 (3.2)             | 3 (6.0)                 | 0.655    |
| Solid organ transplantation             | 6 (5.4)             | 5 (8.1)             | 1 (2.0)                 | 0.222    |
| Charlson Comorbidity Index score        | 5 (4-8)             | 5 (3-7)             | 5 (3-6)                 | 0.436    |

Data are presented as median (interquartile range) or number (%).

These data exclude one patient whose treatment outcome was unknown due to transfer to another hospital during treatment.
